# Supplementary material for: Identification and screening of novel diterpenoids from roasted arabica coffee in the regulation of lipid content in white adipocytes
Source: Royal Society of Chemistry journal article supplement (doi:10.1039/d3fo01130e), 2023-01-01
Supplement: d3fo01130e2.pdf [file d3fo01130e2.pdf]

**Western blot datas:** (A) Western blot data in Fig. 4F of the manuscript. (B) Western blot data in Fig. 6A of the manuscript. (C) Western blot data in Fig. 6C of the manuscript. (D) Western blot data in Fig. 7A of the manuscript. (E) Western blot data in Fig. 7C of the manuscript. (F) Western blot data in Fig. 7F of the manuscript.

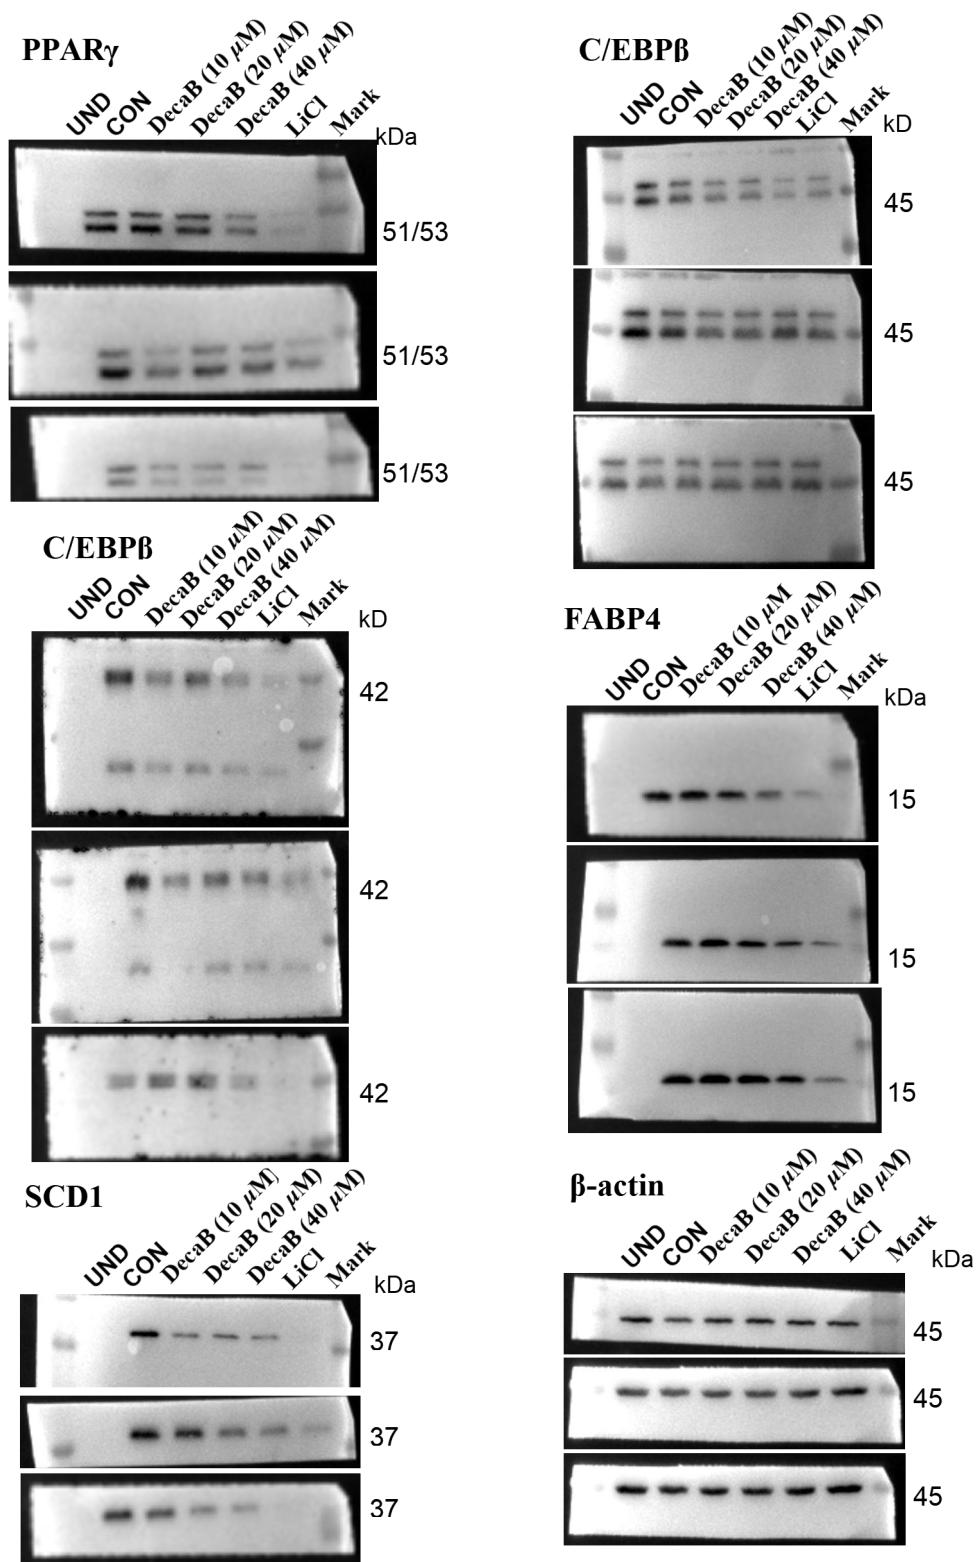

(A) Western blot data in Fig. 4F of the manuscript.

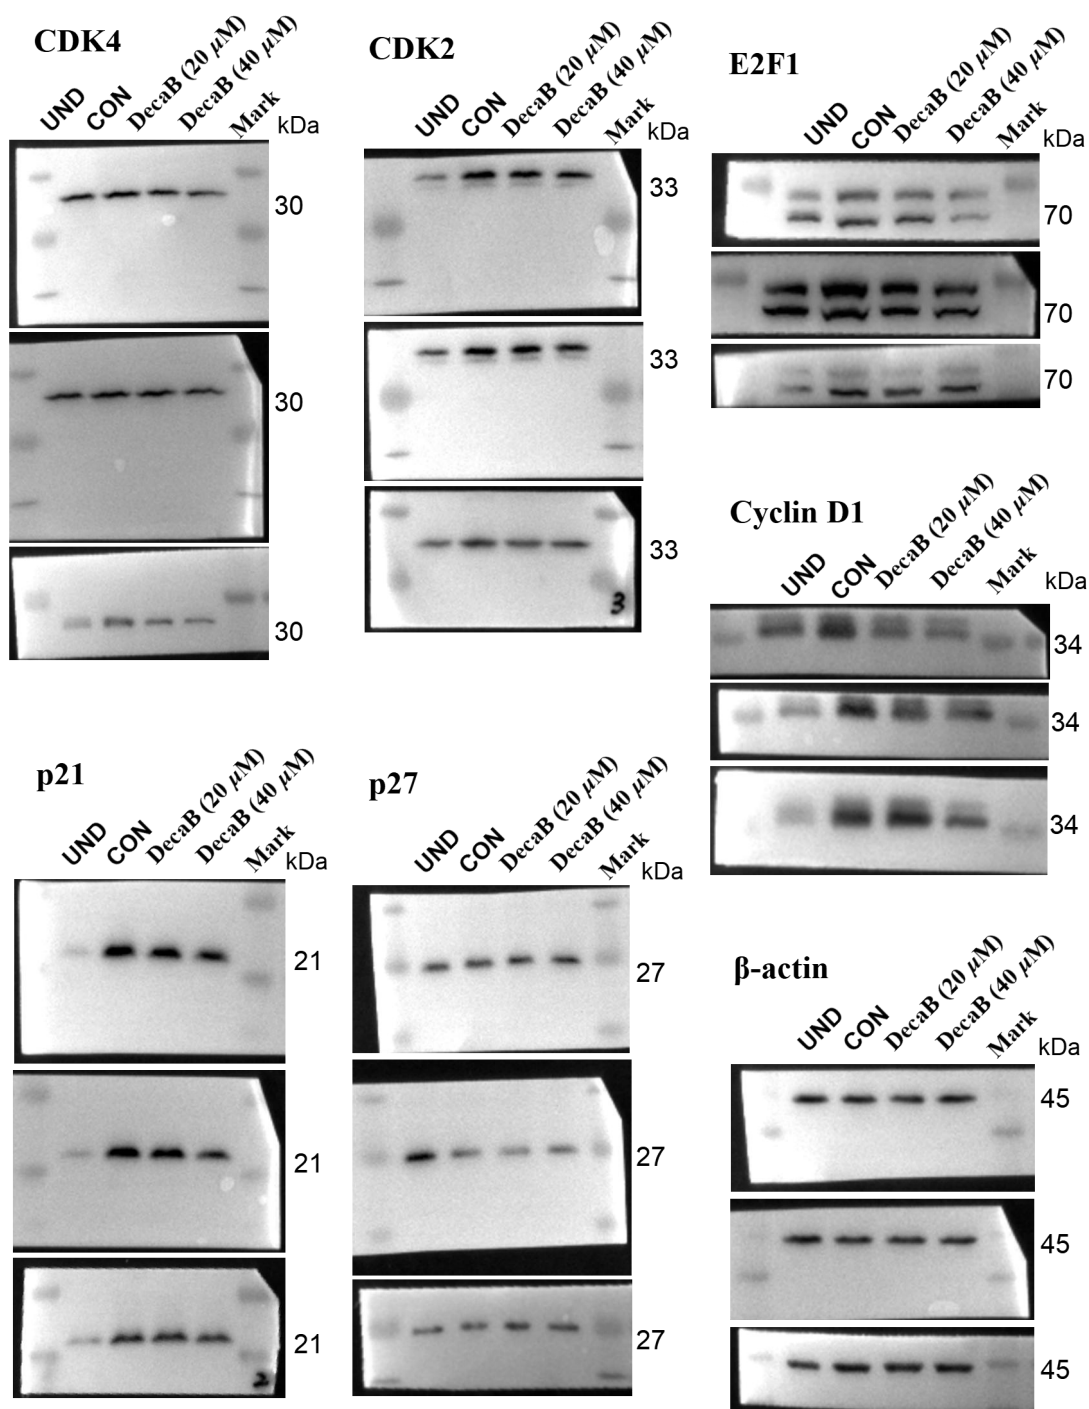

(B) Western blot data in Fig. 6A of the manuscript.

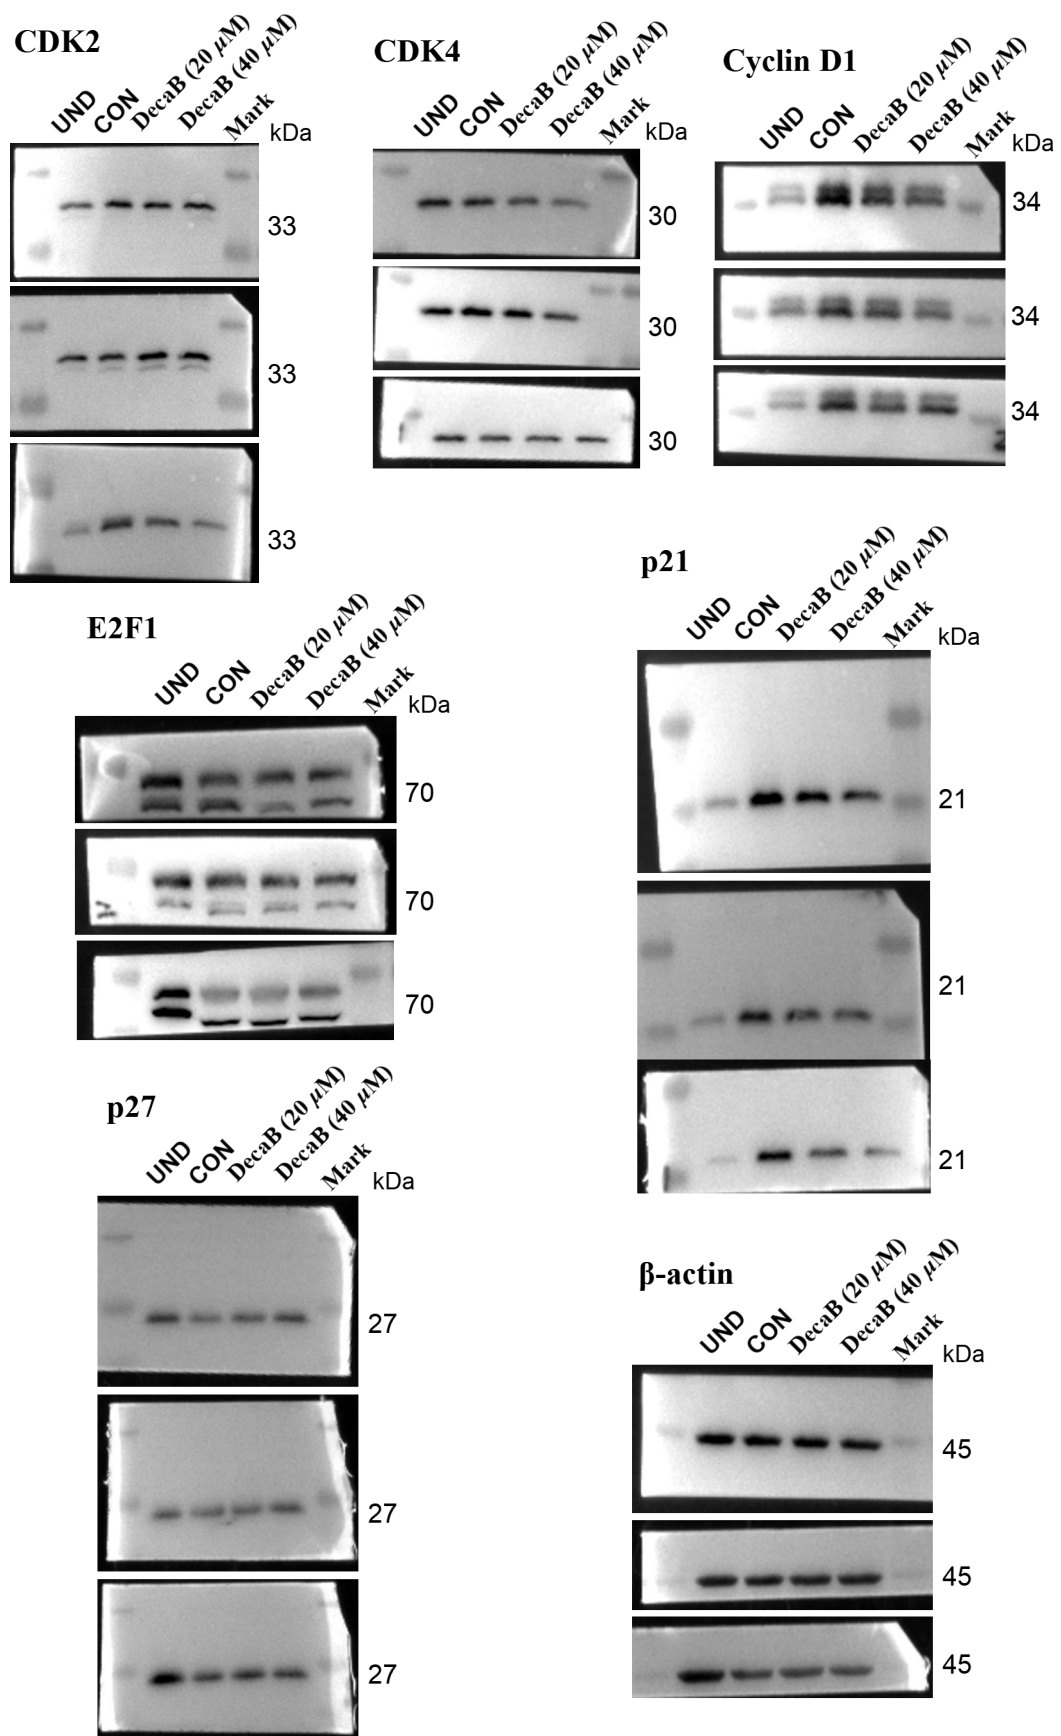

(C) Western blot data in Fig. 6C of the manuscript.

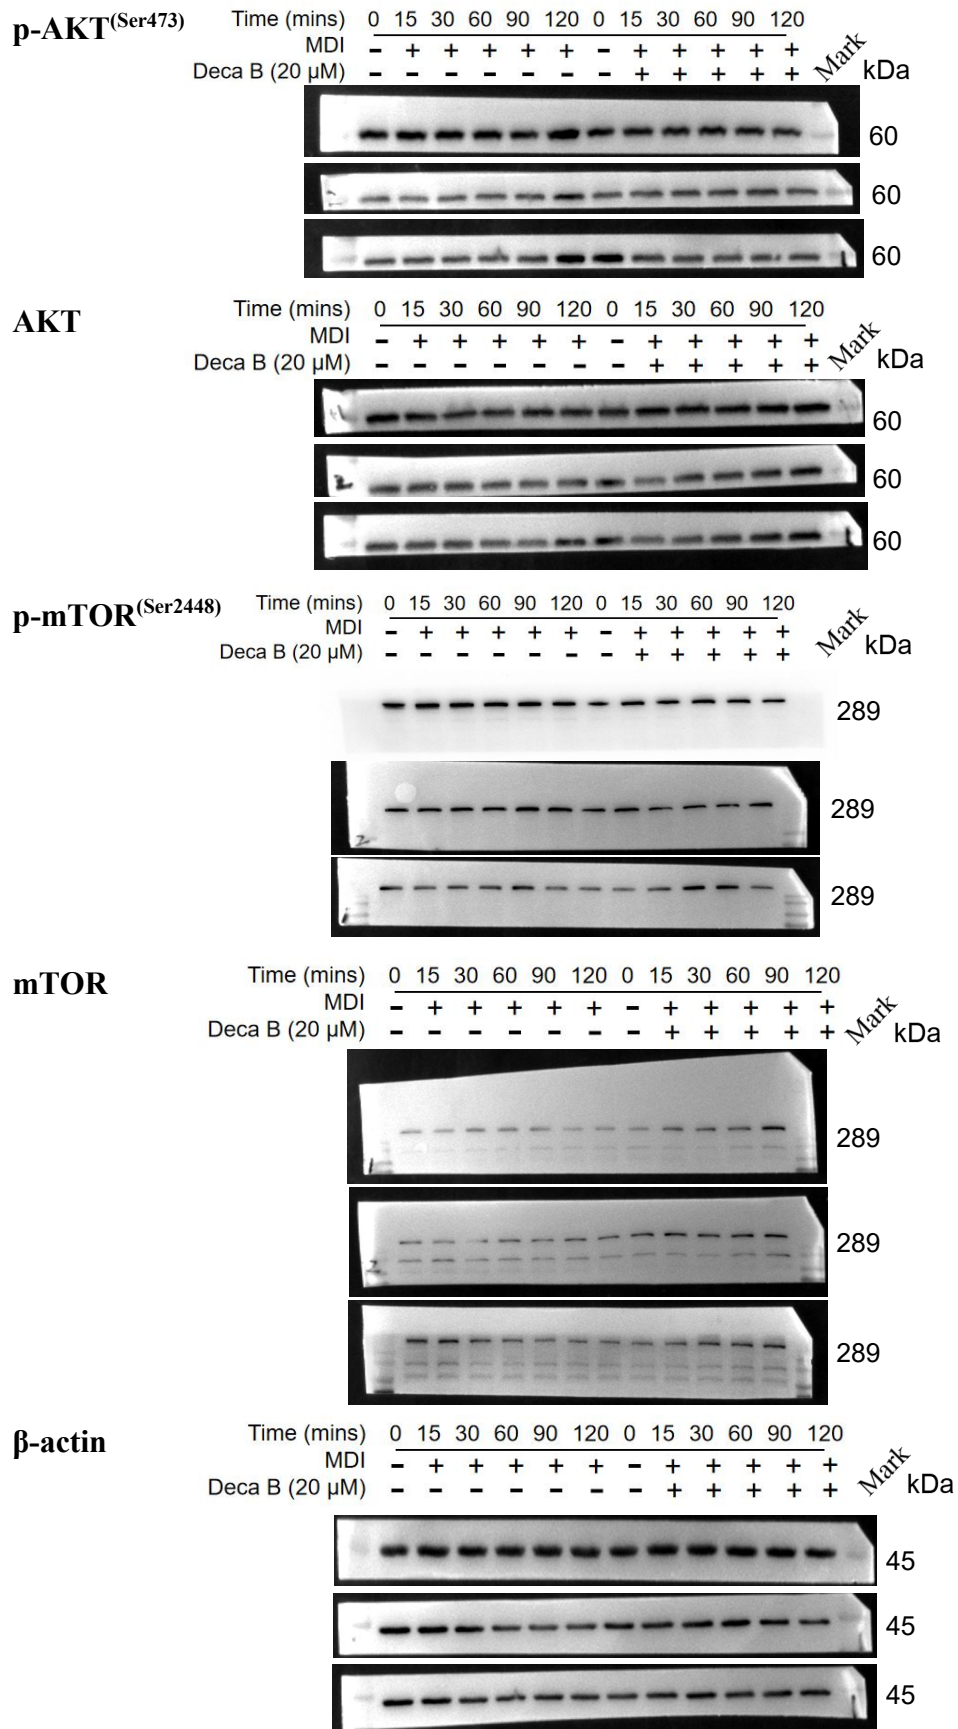

(D) Western blot data in Fig. 7A of the manuscript.

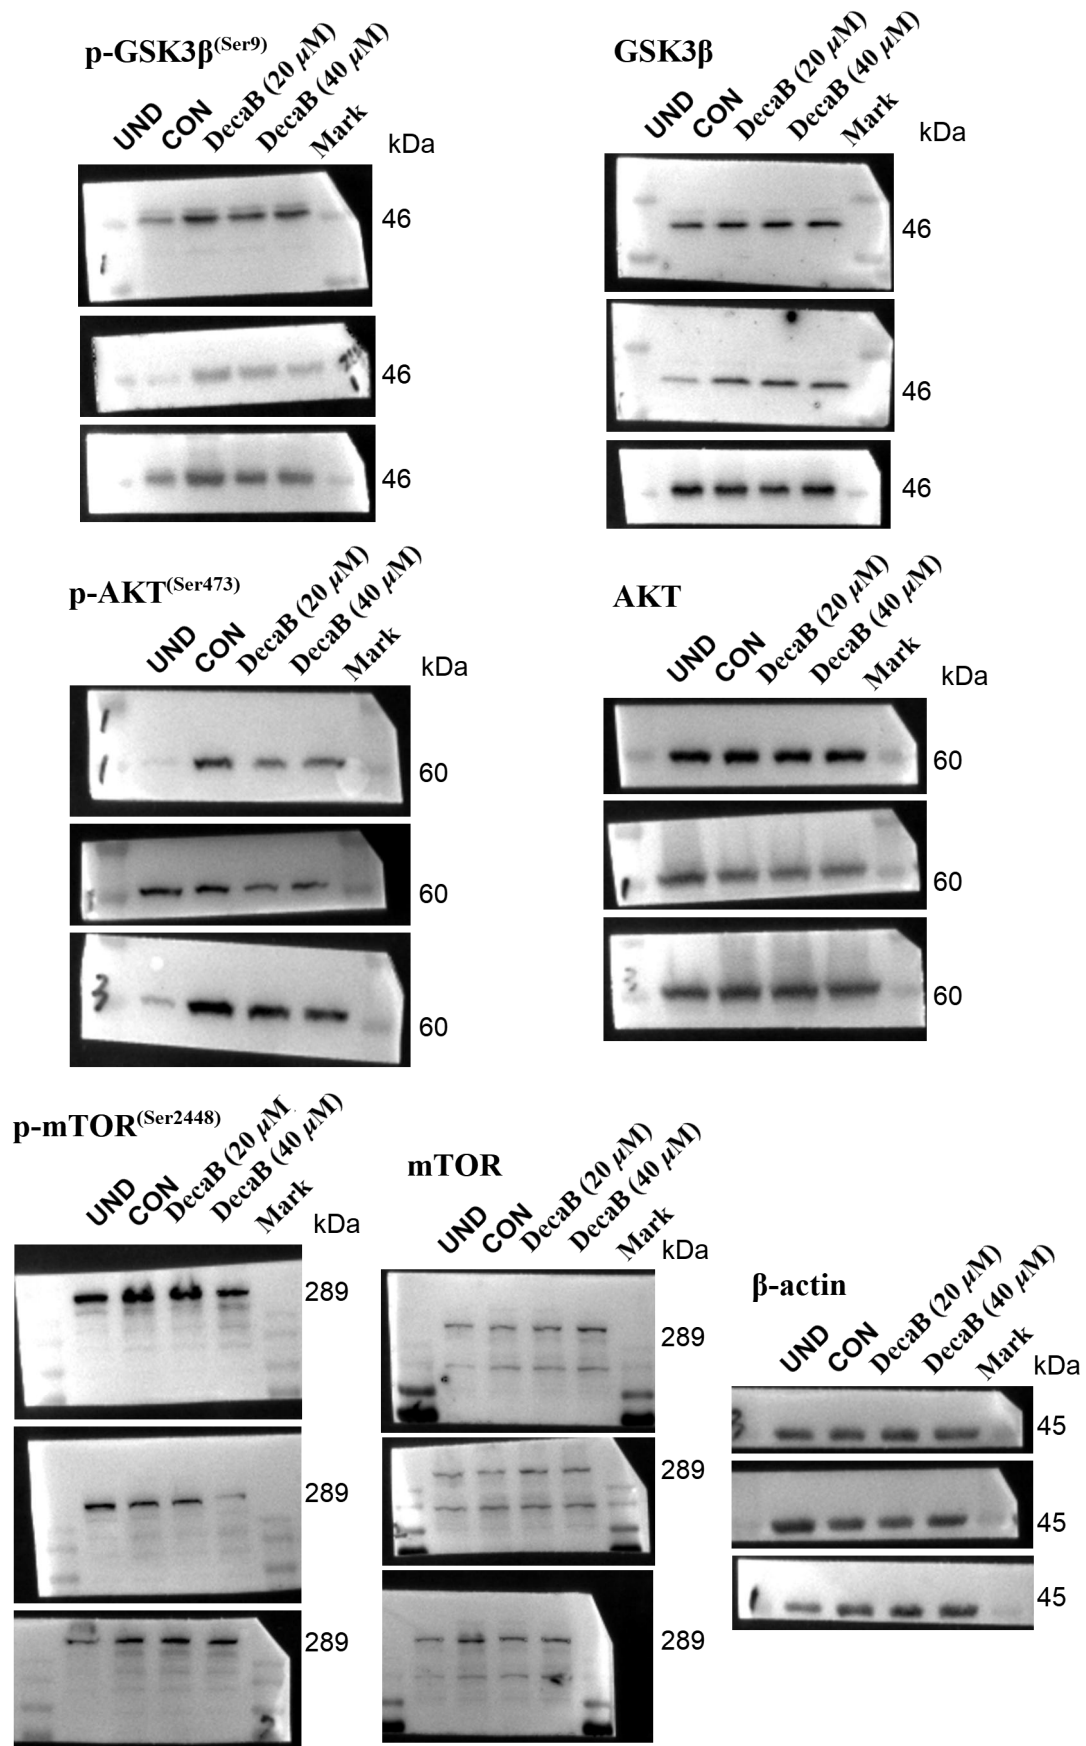

(E) Western blot data in Fig. 7C of the manuscript.

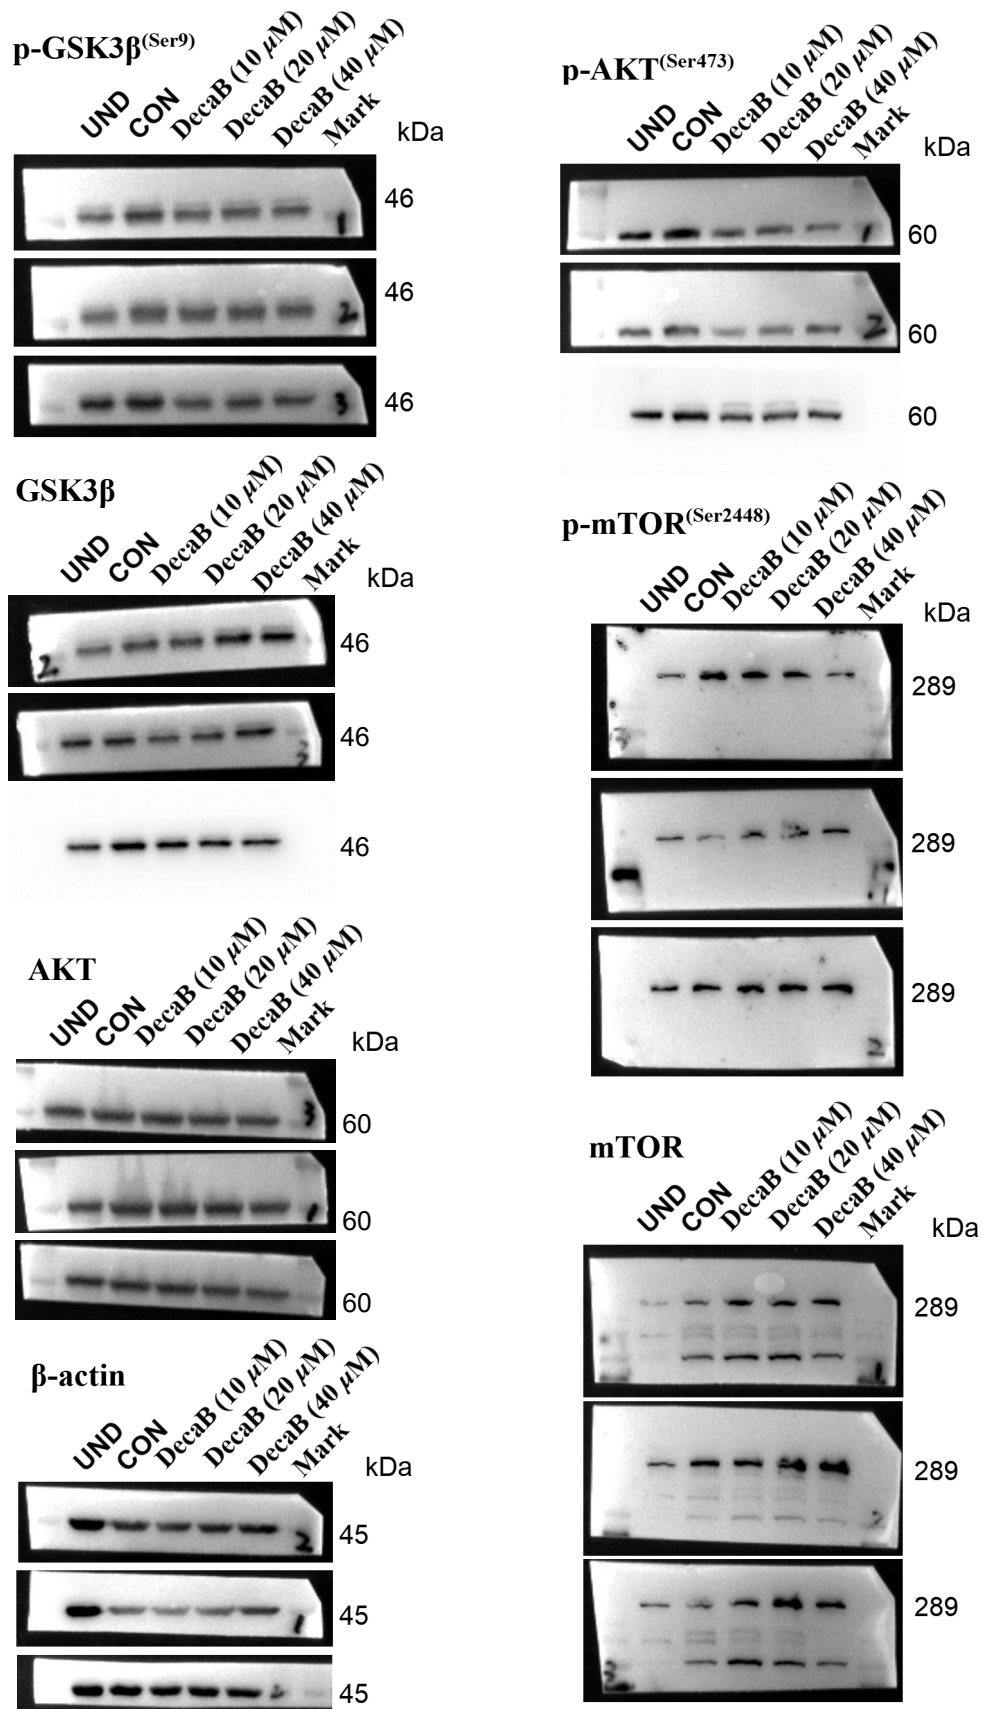

(F) Western blot data in Fig. 7F of the manuscript.
